# Supplementary material for: Assessment of an intrinsic kinetic model for TiO2–formic acid photodegradation using LEDs as a radiation source
Source: Royal Society of Chemistry journal article supplement (doi:10.1039/d0cy01081b), 2020-01-01
Supplement: d0cy01081b1.pdf [file d0cy01081b1.pdf]

## ASSESSMENT OF AN INTRINSIC KINETIC MODEL FOR TiO<sub>2</sub>-FORMIC ACID PHOTODEGRADATION USING LEDS AS RADIATION SOURCE

Alvaro Tolosana-Moranchel<sup>1</sup>, M. Faraldos<sup>2</sup>, Ana Bahamonde<sup>2</sup>

<sup>1</sup>Nanotechnology and Integrated BioEngineering Centre, School of Engineering, Ulster University, Northern Ireland, BT37 0QB, United Kingdom.

<sup>2</sup>Instituto de Catálisis y Petroleoquímica, ICP-CSIC, C/ Marie Curie 2, 28049 Madrid (Spain).

### SUPPORTING INFORMATION

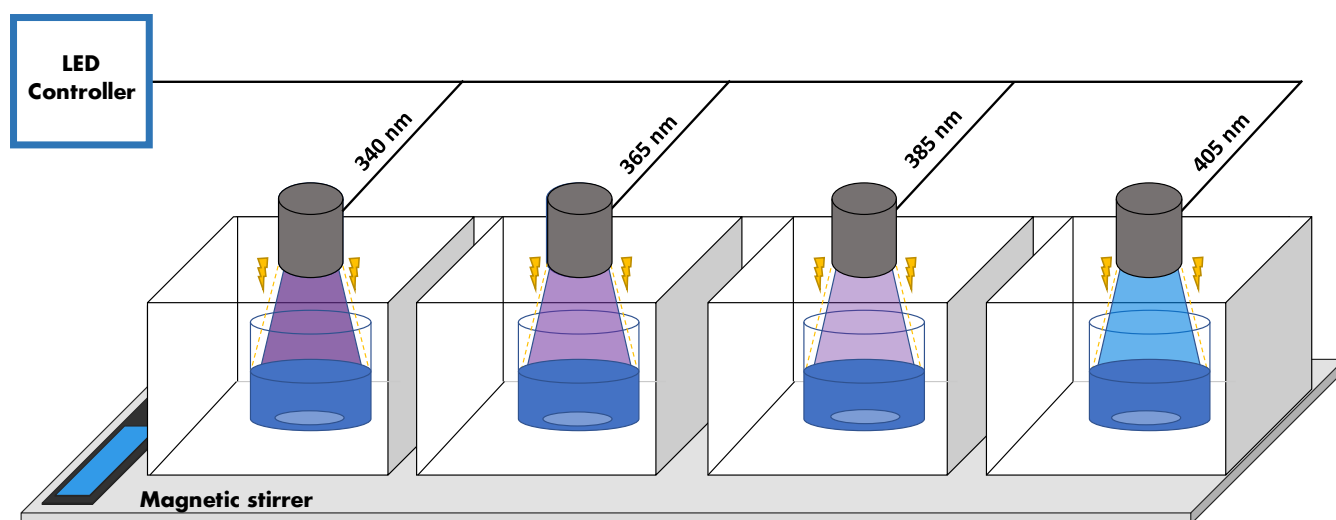

**Figure S1.** Scheme of the experimental setup employed in the photocatalytic degradation of HCOOH.

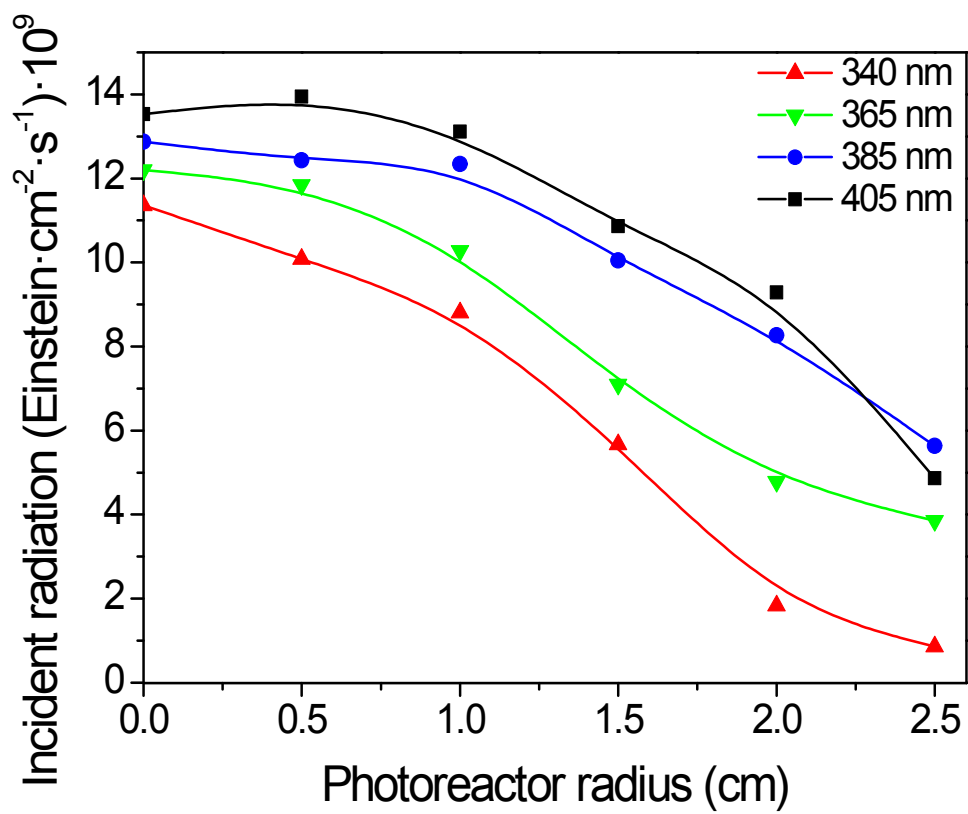

**Figure S2.** Incident radiation measured along the radius of the photoreactor.

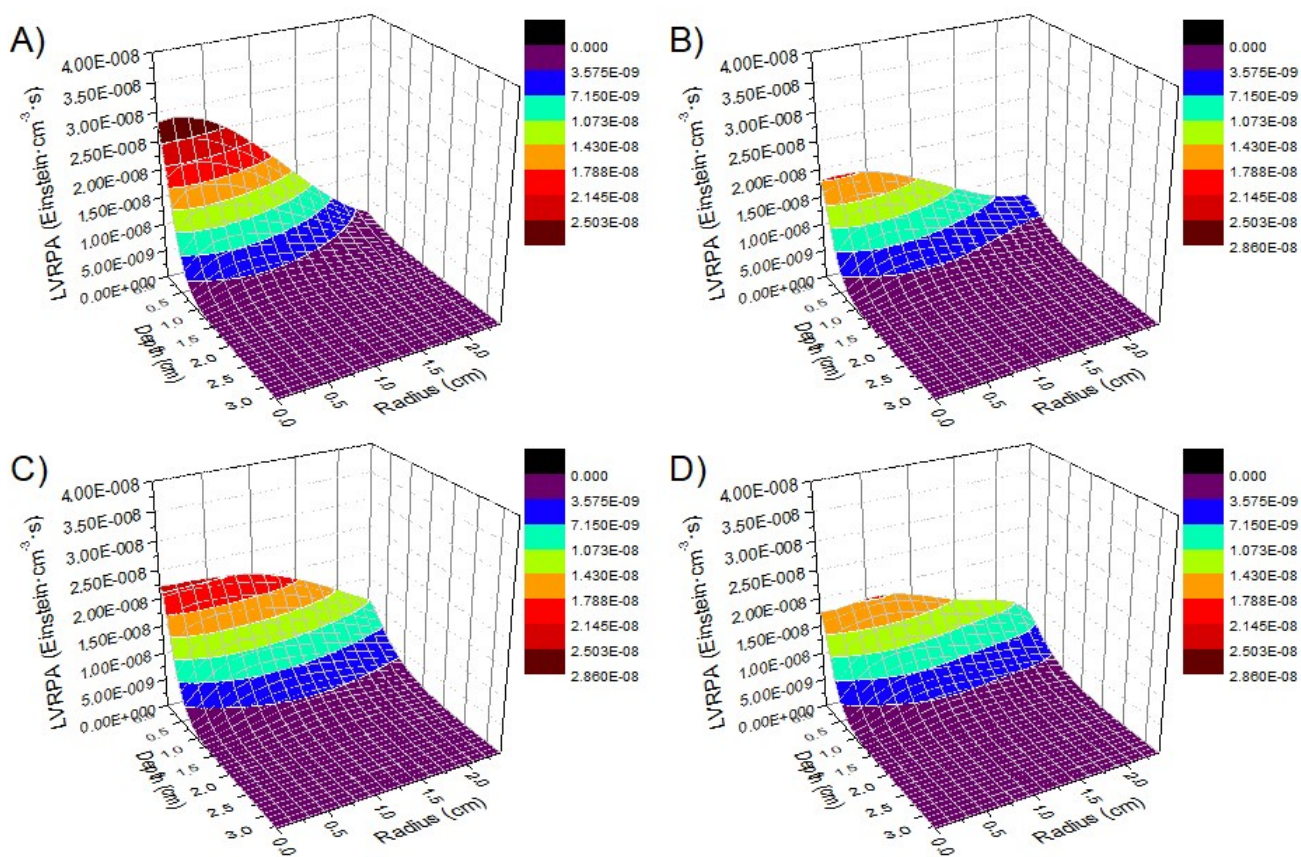

**Figure S3.** LVRPA profiles estimated for the different LEDs using 250 mg·L<sup>-1</sup> of K7000 photocatalyst and the highest studied average inlet radiation: A) 340 nm, B) 365 nm, C) 385 nm and D) 405 nm.

**Table S1.** Observed initial molar reaction rate of HCOOH photodegradation  $\langle r_{HCOOH}(x, r, t_0) \rangle_{V_R}$  with K7000 estimated under different operating conditions.

| <b>LED 340 nm</b>                            |                                                                                                    |                                                                                                             |                | <b>LED 365 nm</b>                            |                                                                                                    |                                                                                                             |                |
|----------------------------------------------|----------------------------------------------------------------------------------------------------|-------------------------------------------------------------------------------------------------------------|----------------|----------------------------------------------|----------------------------------------------------------------------------------------------------|-------------------------------------------------------------------------------------------------------------|----------------|
| [TiO <sub>2</sub> ]<br>(mg·L <sup>-1</sup> ) | Average Incident<br>radiation<br>(Einstein·cm <sup>-2</sup> ·s <sup>-1</sup> )<br>·10 <sup>9</sup> | $\langle r_{HCOOH}(x, r, t_0) \rangle_{V_R}$<br>(mmol·L <sup>-1</sup> ·min <sup>-1</sup> ) ·10 <sup>3</sup> | r <sup>2</sup> | [TiO <sub>2</sub> ]<br>(mg·L <sup>-1</sup> ) | Average Incident<br>radiation<br>(Einstein·cm <sup>-2</sup> ·s <sup>-1</sup> )<br>·10 <sup>9</sup> | $\langle r_{HCOOH}(x, r, t_0) \rangle_{V_R}$<br>(mmol·L <sup>-1</sup> ·min <sup>-1</sup> ) ·10 <sup>3</sup> | r <sup>2</sup> |
| 250                                          | 6.26                                                                                               | 8.02                                                                                                        | 0.998          | 250                                          | 4.94                                                                                               | 11.51                                                                                                       | 0.994          |
| 250                                          | 3.77                                                                                               | 5.59                                                                                                        | 0.995          | 250                                          | 4.17                                                                                               | 8.66                                                                                                        | 0.998          |
| 250                                          | 1.90                                                                                               | 2.11                                                                                                        | 0.990          | 250                                          | 2.11                                                                                               | 5.30                                                                                                        | 0.998          |
| 125                                          | 6.26                                                                                               | 7.33                                                                                                        | 0.992          | 125                                          | 4.94                                                                                               | 9.73                                                                                                        | 0.999          |
| 50                                           | 6.26                                                                                               | 5.66                                                                                                        | 0.995          | 50                                           | 4.94                                                                                               | 3.88                                                                                                        | 0.994          |
| <b>LED 385 nm</b>                            |                                                                                                    |                                                                                                             |                | <b>LED 405 nm</b>                            |                                                                                                    |                                                                                                             |                |
| [TiO <sub>2</sub> ]<br>(mg·L <sup>-1</sup> ) | Average Incident<br>radiation<br>(Einstein·cm <sup>-2</sup> ·s <sup>-1</sup> )<br>·10 <sup>9</sup> | $\langle r_{HCOOH}(x, r, t_0) \rangle_{V_R}$<br>(mmol·L <sup>-1</sup> ·min <sup>-1</sup> ) ·10 <sup>3</sup> | r <sup>2</sup> | [TiO <sub>2</sub> ]<br>(mg·L <sup>-1</sup> ) | Average Incident<br>radiation<br>(Einstein·cm <sup>-2</sup> ·s <sup>-1</sup> )<br>·10 <sup>9</sup> | $\langle r_{HCOOH}(x, r, t_0) \rangle_{V_R}$<br>(mmol·L <sup>-1</sup> ·min <sup>-1</sup> ) ·10 <sup>3</sup> | r <sup>2</sup> |
| 250                                          | 10.42                                                                                              | 5.87                                                                                                        | 0.997          | 250                                          | 9.93                                                                                               | 1.61                                                                                                        | 0.997          |
| 250                                          | 7.00                                                                                               | 3.49                                                                                                        | 0.999          | 250                                          | 6.81                                                                                               |                                                                                                             |                |
| 250                                          | 2.67                                                                                               | 1.60                                                                                                        | 0.995          | 250                                          | 3.01                                                                                               |                                                                                                             |                |
| 125                                          | 10.42                                                                                              | 4.10                                                                                                        | 0.997          | 125                                          | 9.93                                                                                               | 0.42                                                                                                        | 0.873          |
| 50                                           | 10.42                                                                                              | 1.78                                                                                                        | 0.998          | 50                                           | 9.93                                                                                               | 0.41                                                                                                        | 0.968          |

**Table S2.** Observed initial molar reaction rate of HCOOH photodegradation  $\langle r_{HCOOH}(x, r, t_0) \rangle_{V_R}$  with K7050 estimated under different operating conditions.

| <b>LED 340 nm</b>                            |                                                                                                    |                                                                                                                |                | <b>LED 365 nm</b>                            |                                                                                                    |                                                                                                             |                |
|----------------------------------------------|----------------------------------------------------------------------------------------------------|----------------------------------------------------------------------------------------------------------------|----------------|----------------------------------------------|----------------------------------------------------------------------------------------------------|-------------------------------------------------------------------------------------------------------------|----------------|
| [TiO <sub>2</sub> ]<br>(mg·L <sup>-1</sup> ) | Average Incident<br>radiation<br>(Einstein·cm <sup>-2</sup> ·s <sup>-1</sup> )<br>·10 <sup>9</sup> | $\langle r_{HCOOH}(x, r, t_0) \rangle_{V_R}$<br>(mmol·L <sup>-1</sup> ·min <sup>-1</sup> ) ·10 <sup>3</sup>    | r <sup>2</sup> | [TiO <sub>2</sub> ]<br>(mg·L <sup>-1</sup> ) | Average Incident<br>radiation<br>(Einstein·cm <sup>-2</sup> ·s <sup>-1</sup> )<br>·10 <sup>9</sup> | $\langle r_{HCOOH}(x, r, t_0) \rangle_{V_R}$<br>(mmol·L <sup>-1</sup> ·min <sup>-1</sup> ) ·10 <sup>3</sup> | r <sup>2</sup> |
| 250                                          | 6.26                                                                                               | 5.14                                                                                                           | 0.992          | 250                                          | 4.94                                                                                               | 9.12                                                                                                        | 0.998          |
| 250                                          | 3.77                                                                                               | 4.22                                                                                                           | 0.993          | 250                                          | 4.17                                                                                               | 5.78                                                                                                        | 0.994          |
| 250                                          | 1.90                                                                                               | 2.79                                                                                                           | 0.990          | 250                                          | 2.11                                                                                               | 5.01                                                                                                        | 0.998          |
| 125                                          | 6.26                                                                                               | 2.75                                                                                                           | 0.995          | 125                                          | 4.94                                                                                               | 9.07                                                                                                        | 0.991          |
| 50                                           | 6.26                                                                                               | 2.04                                                                                                           | 0.995          | 50                                           | 4.94                                                                                               | 2.17                                                                                                        | 0.992          |
| <b>LED 385 nm</b>                            |                                                                                                    |                                                                                                                |                | <b>LED 405 nm</b>                            |                                                                                                    |                                                                                                             |                |
| [TiO <sub>2</sub> ]<br>(mg·L <sup>-1</sup> ) | Average Incident<br>radiation<br>(Einstein·cm <sup>-2</sup> ·s <sup>-1</sup> )<br>·10 <sup>9</sup> | $\langle r_{HCOOH}(x, r, t_0) \rangle_{V_R}$<br>(mmol·L <sup>-1</sup> ·min <sup>-1</sup> )<br>·10 <sup>3</sup> | r <sup>2</sup> | [TiO <sub>2</sub> ]<br>(mg·L <sup>-1</sup> ) | Average Incident<br>radiation<br>(Einstein·cm <sup>-2</sup> ·s <sup>-1</sup> )<br>·10 <sup>9</sup> | $\langle r_{HCOOH}(x, r, t_0) \rangle_{V_R}$<br>(mmol·L <sup>-1</sup> ·min <sup>-1</sup> ) ·10 <sup>3</sup> | r <sup>2</sup> |
| 250                                          | 10.42                                                                                              | 6.71                                                                                                           | 0.991          | 250                                          | 9.93                                                                                               | 1.45                                                                                                        | 0.965          |
| 250                                          | 7.00                                                                                               | 3.94                                                                                                           | 0.995          | 250                                          | 6.81                                                                                               |                                                                                                             |                |
| 250                                          | 2.67                                                                                               | 2.82                                                                                                           | 0.999          | 250                                          | 3.01                                                                                               |                                                                                                             |                |
| 125                                          | 10.42                                                                                              | 5.18                                                                                                           | 0.995          | 125                                          | 9.93                                                                                               | 0.48                                                                                                        | 0.966          |
| 50                                           | 10.42                                                                                              | 1.16                                                                                                           | 0.996          | 50                                           | 9.93                                                                                               | 0.44                                                                                                        | 0.973          |
